# Supplementary material for: Two types of North American droughts related to different atmospheric circulation patterns
Source: Copernicus journal article supplement (doi:10.5194/cp-15-2053-2019), 2019-12-19
Supplement: Supplementary file 1 [file cp-15-2053-2019-supplement.pdf]

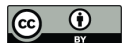

## *Supplement of*

# **Two types of North American droughts related to different atmospheric circulation patterns**

**Angela-Maria Burgdorf et al.**

*Correspondence to:* Angela-Maria Burgdorf ([angela-maria.burgdorf@giub.unibe.ch](mailto:angela-maria.burgdorf@giub.unibe.ch))

The copyright of individual parts of the supplement might differ from the CC BY 4.0 License.

## Supplementary Material

### S1 | “Dust Bowl”-type droughts

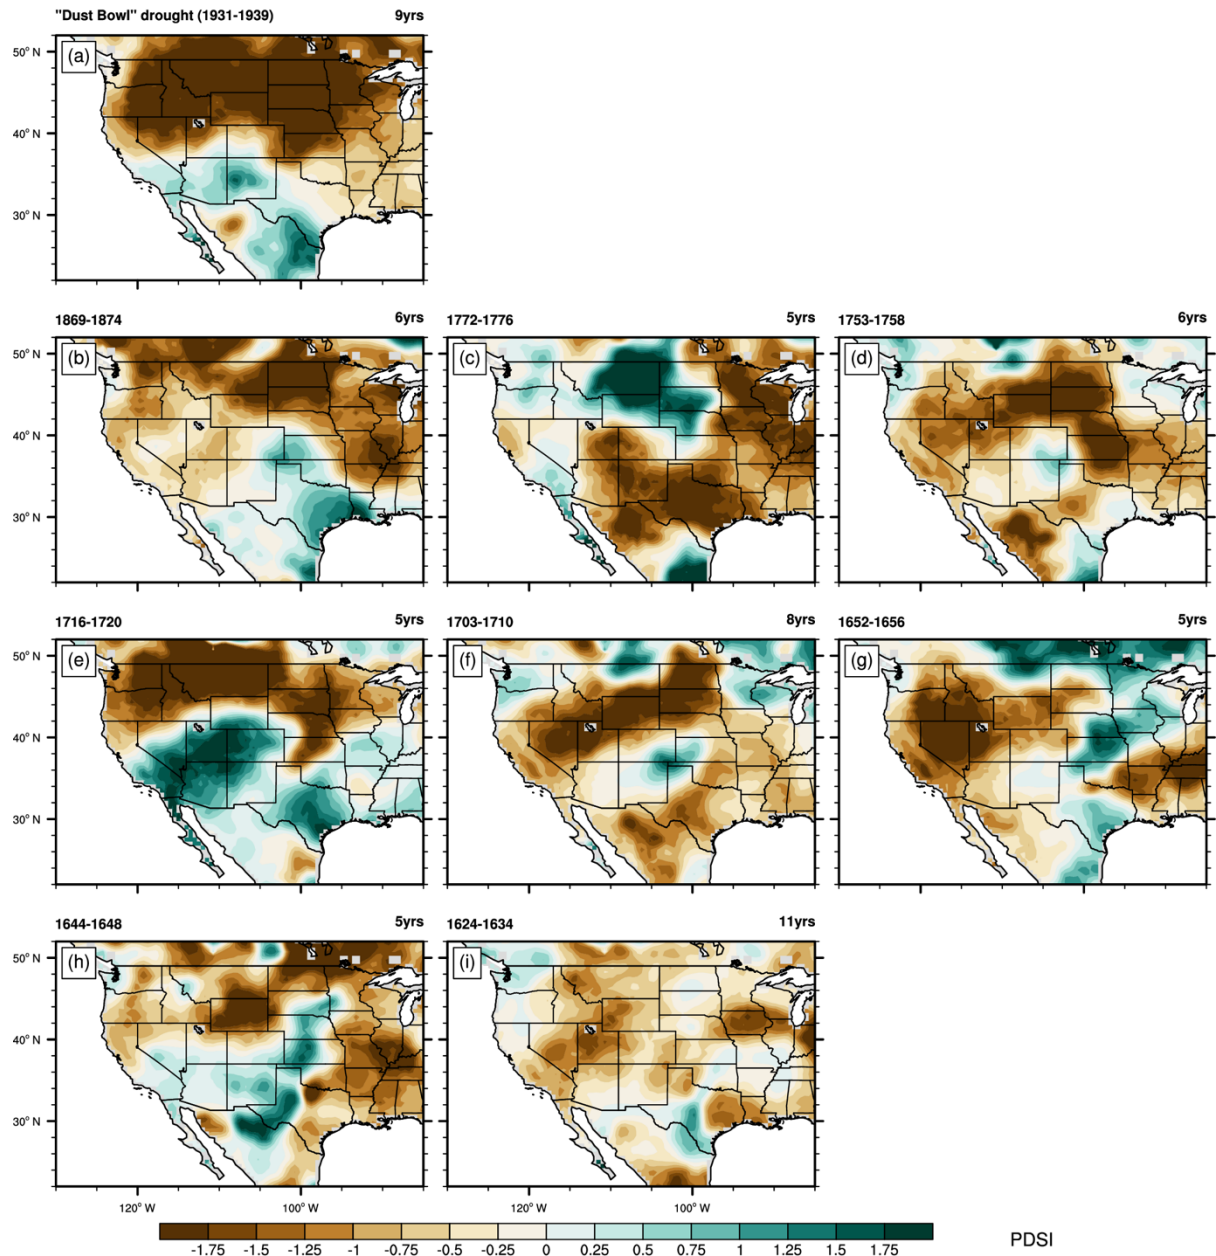

**Figure S1.** Averaged PDSI values from the LBDav1 for the “Dust Bowl” drought (a) and the eight droughts classified as “Dust Bowl”-type droughts (b-i).

## S2 | 1950s-type droughts

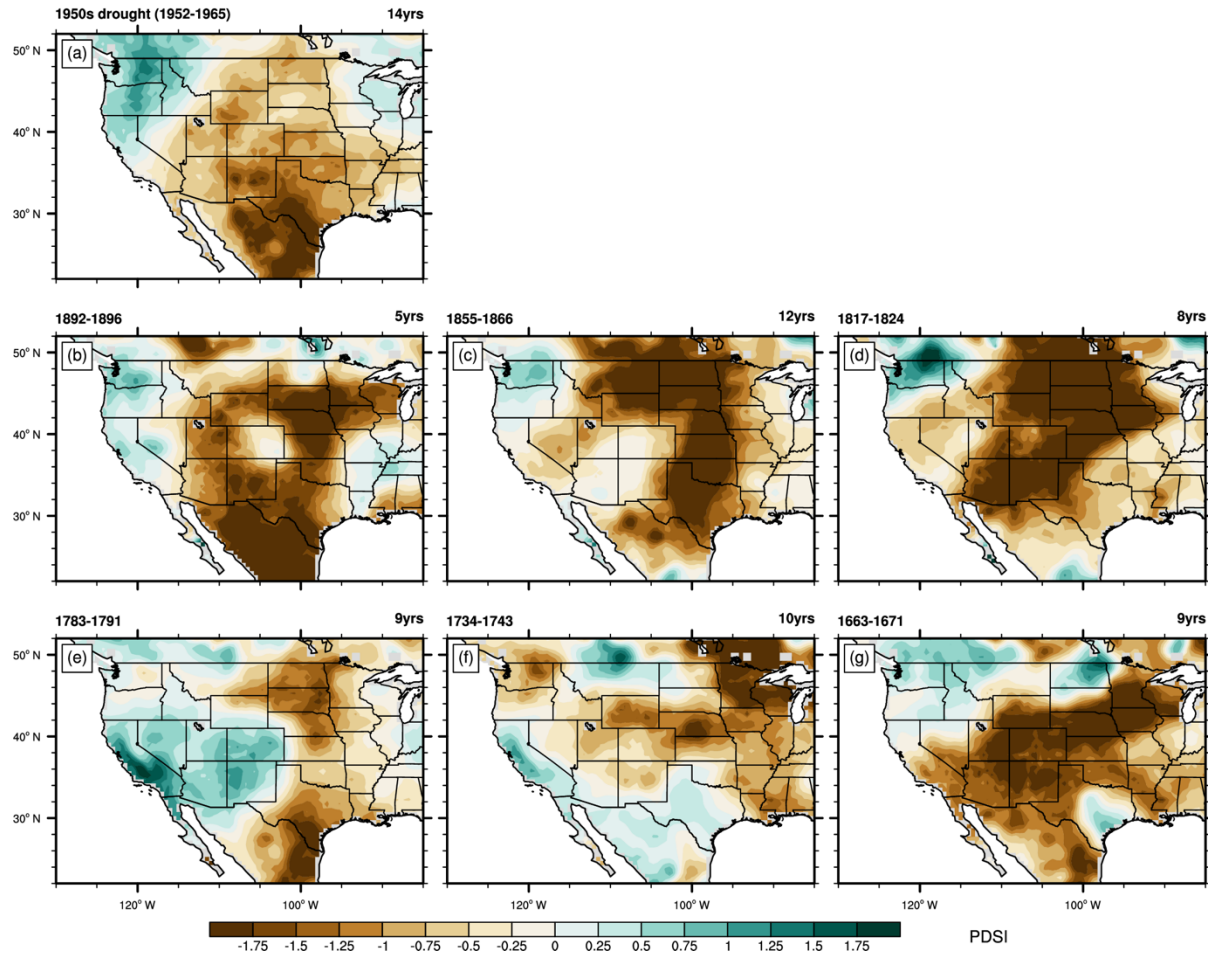

**Figure S2.** Averaged PDSI values from the LBDav1 for the 1950s drought (a) and the six droughts classified as 1950s-type droughts (b-g).

### S3 | Drought clustering: ward

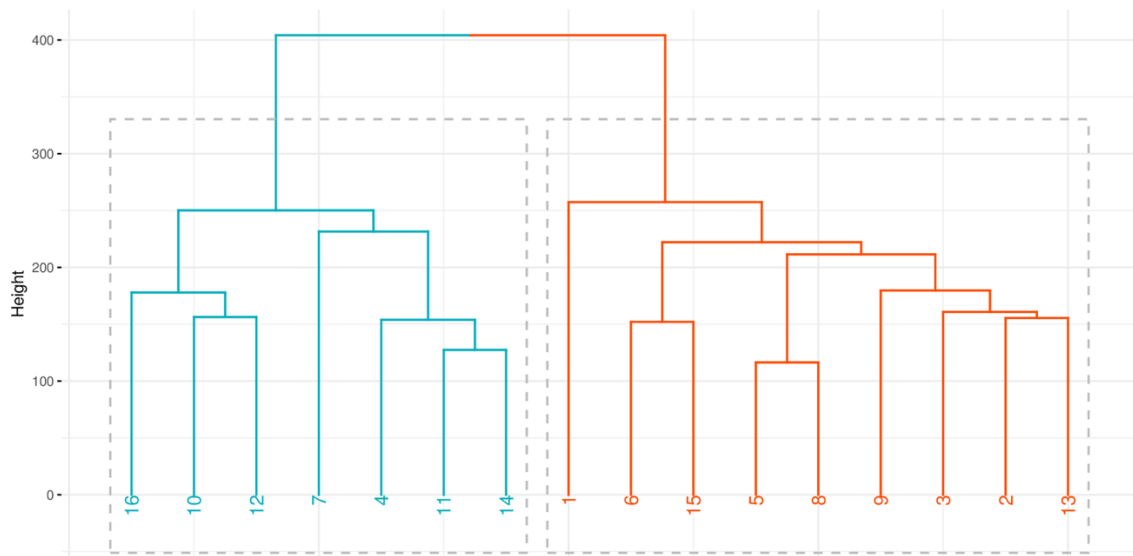

**Figure S3.** First two principal components of the hierarchical clustering based on the ward method of PDSI values for the 16 drought periods.

### S4 | Drought clustering: combined approach k-means & ward

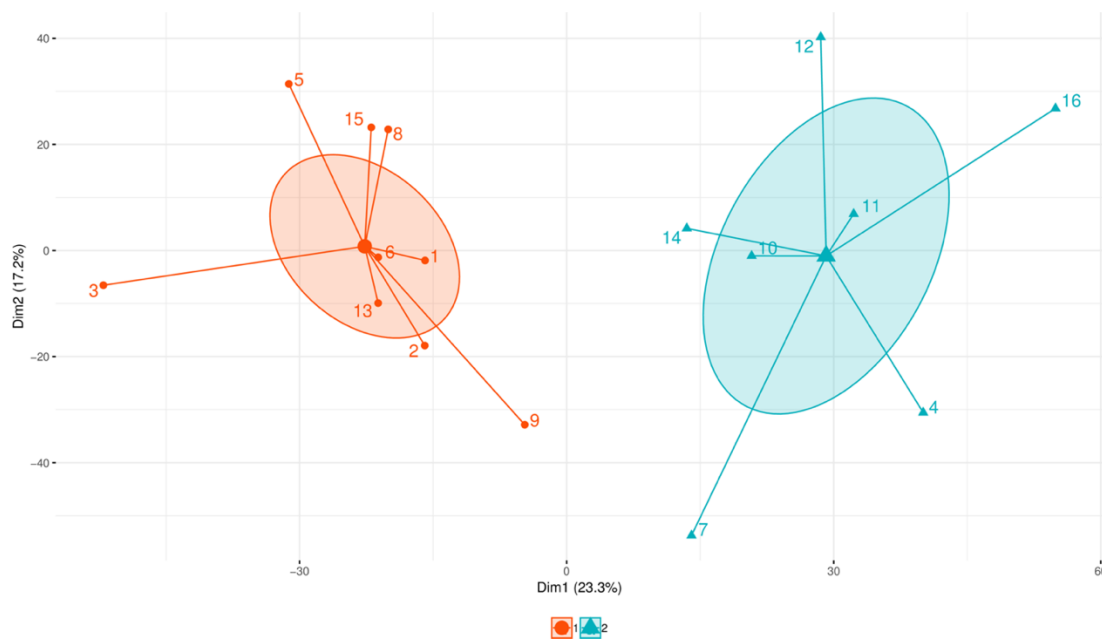

**Figure S4.** First two principal components of PDSI values for the 16 drought periods based on the k-means clustering approach with prescribed cluster centers (defined by the previous experiment with the ward method).

## S5 | Correlation of the Turn-of-the-century drought

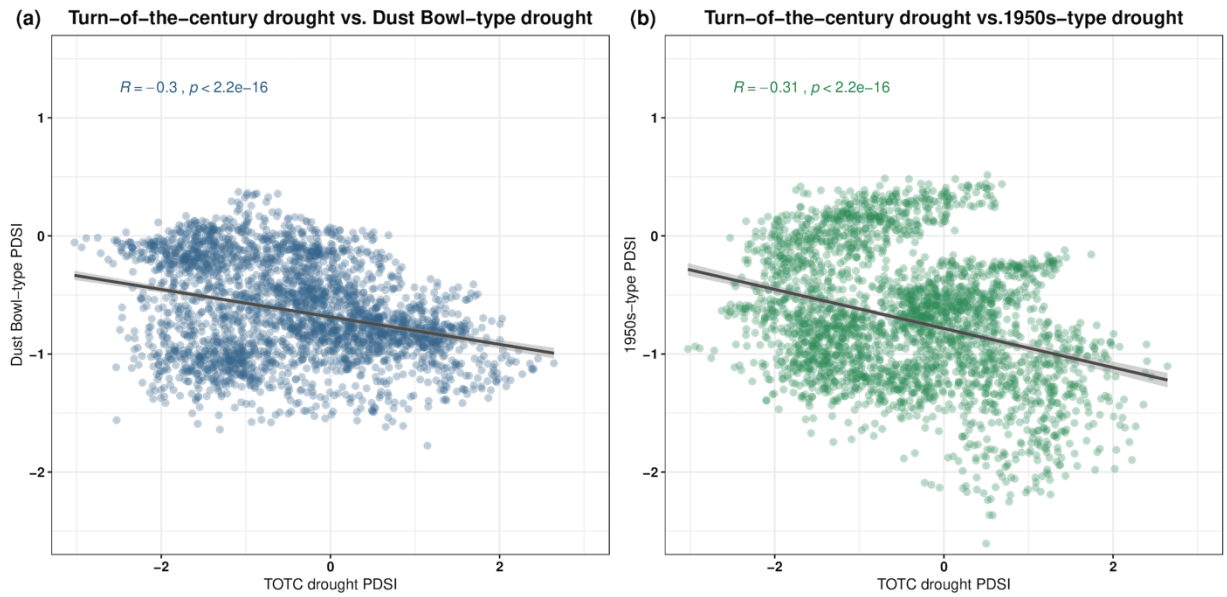

**Figure S5.** Correlations (Pearson) between the turn-of-the-century drought and the “Dust Bowl”-type drought (a) and between the turn-of-the-century drought and the 1950s-type drought respectively (b). Each point depicts a grid box.

## S6 | SLP composites

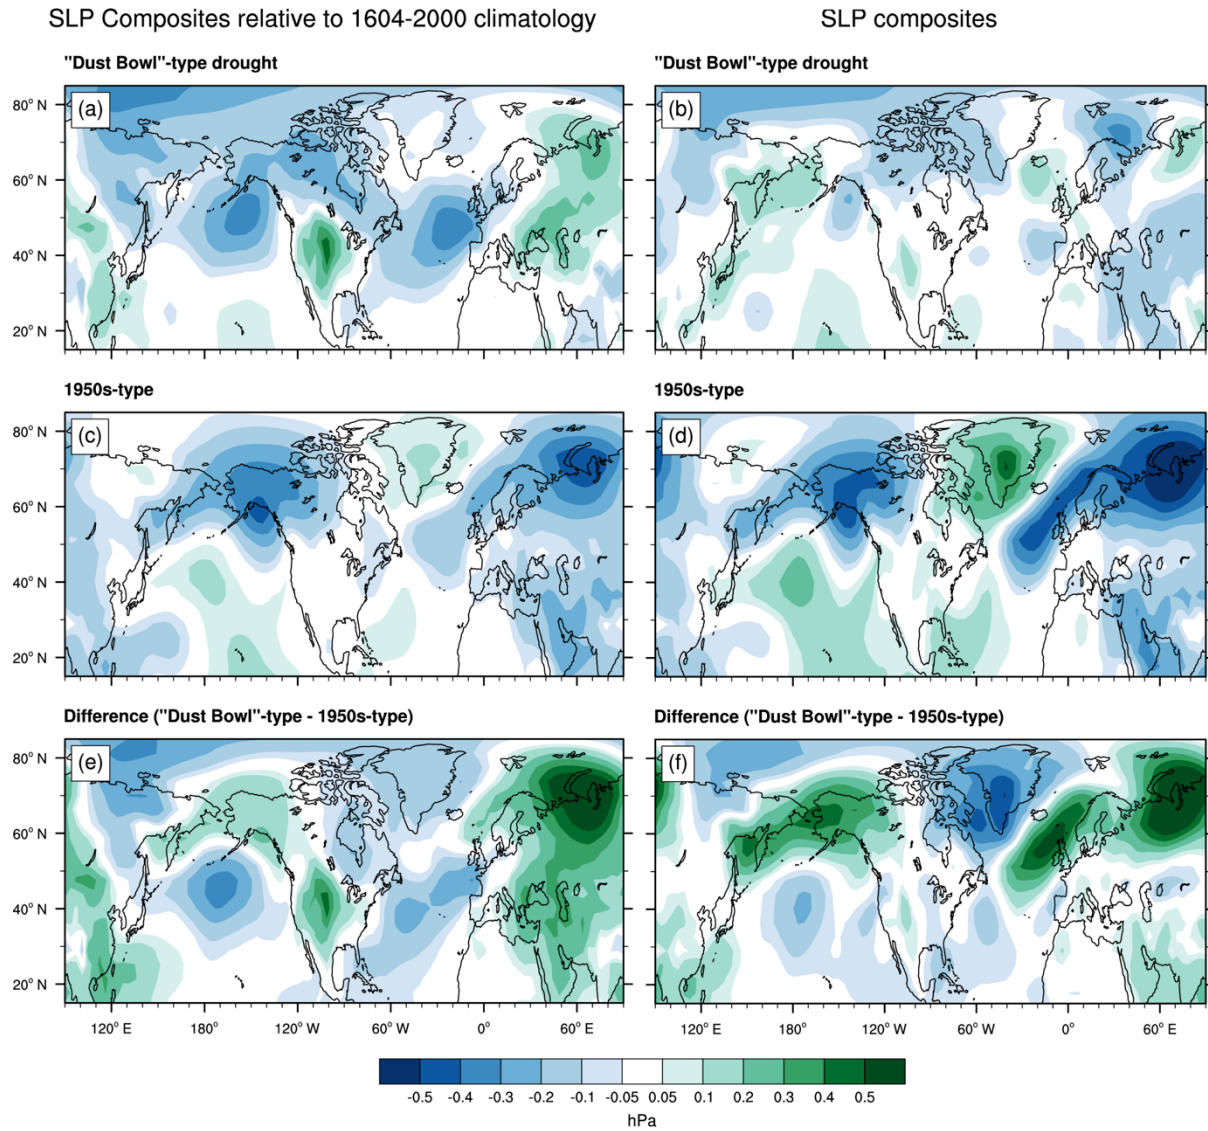

**Figure S6.** SLP composites relative to the 1604-2003 long-term mean (**a, c, e**) and the composites relative to the 5yrs periods prior and after the drought (**b, d, f**). The top row depicts the SLP composites of the “Dust Bowl”-type droughts, the middle row the 1950s-type droughts and the bottom row the difference between the two drought types.



## S7 | Surface temperature composites

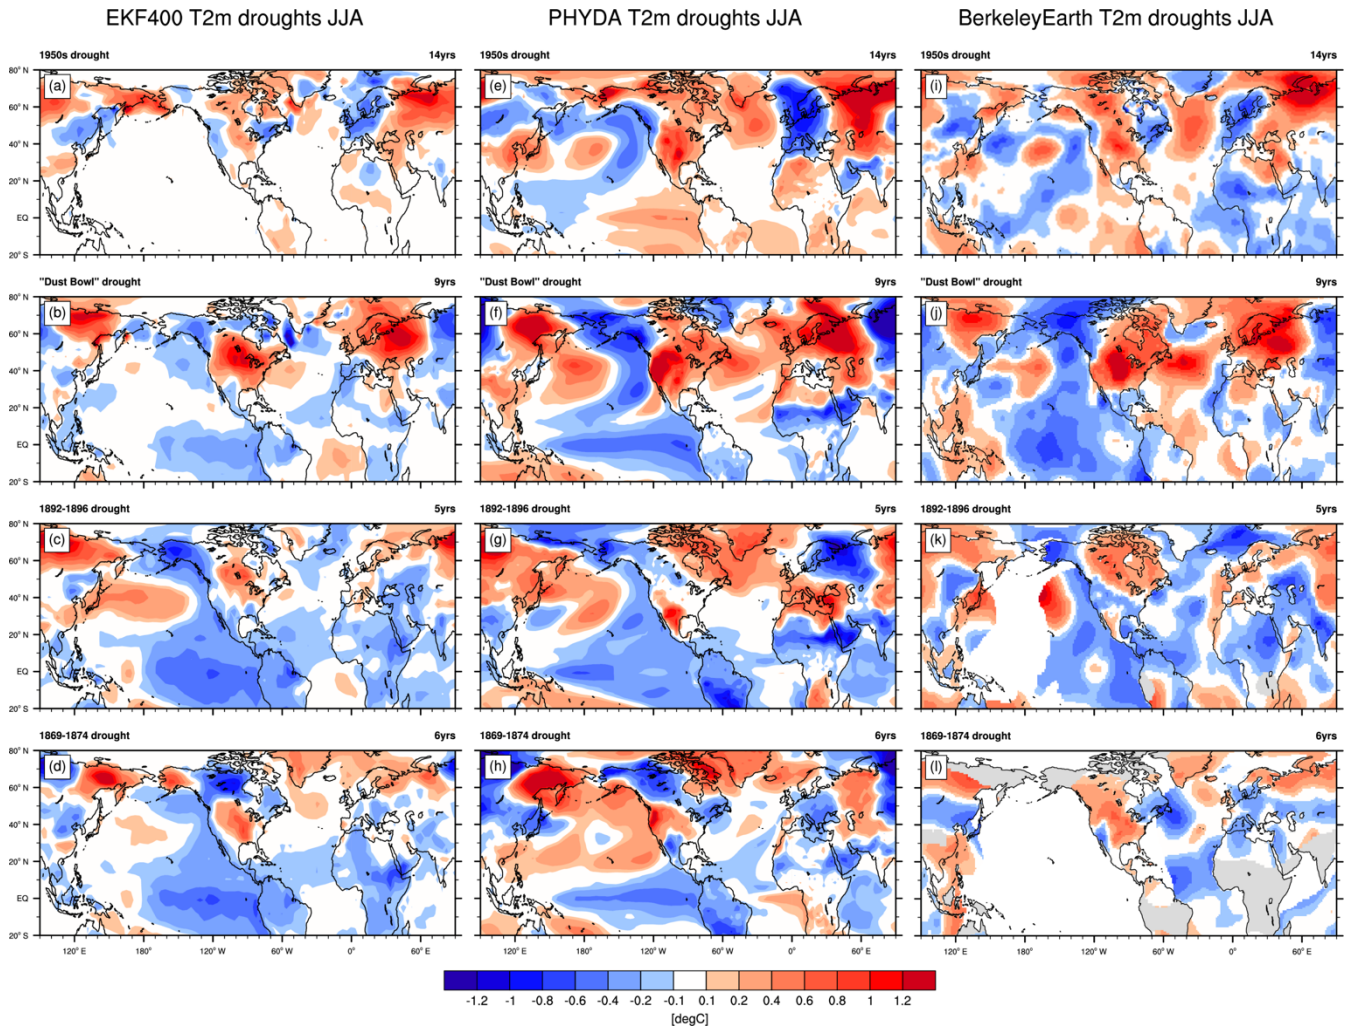

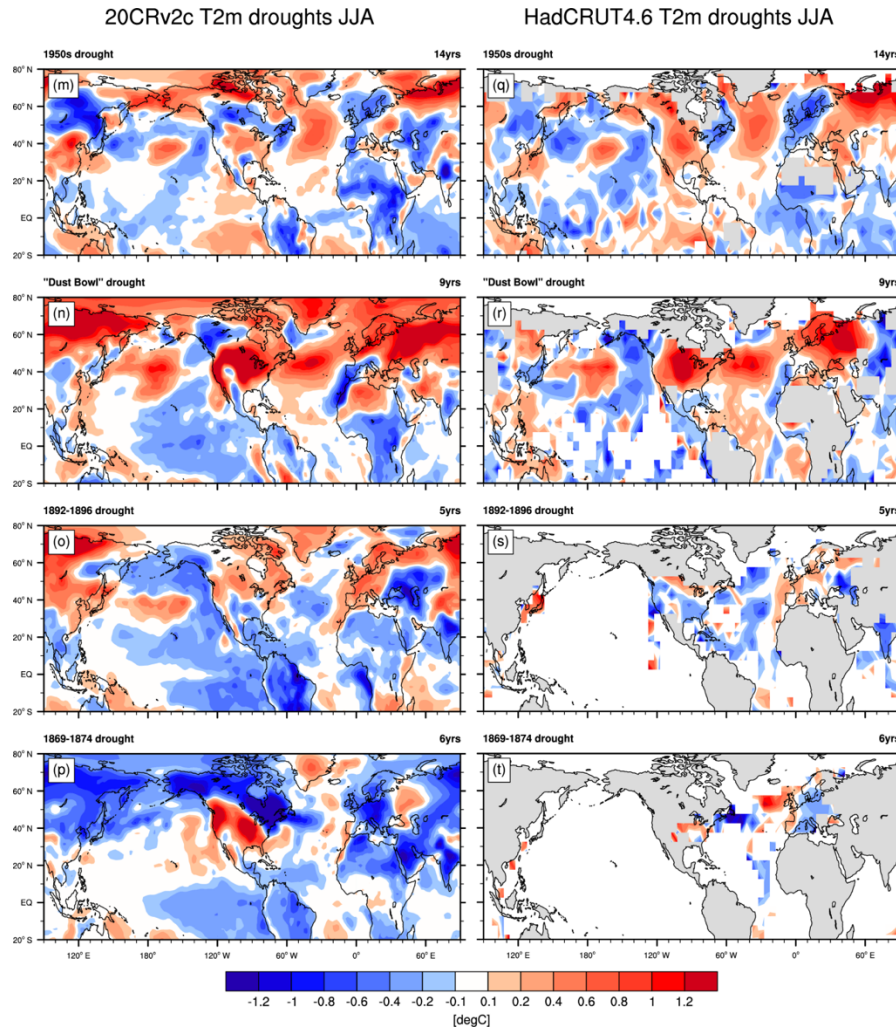

**Figure S7.** Surface temperature composites in five different datasets for the latest four droughts, the 1950s drought (top row), the "Dust Bowl" drought (second row), the 1892-1896 drought (third row) and the 1869-1874 drought (bottom row). The T2m of the two paleo reconstructions EKF400 (a-d) and PHYDA (e-h) are shown as well as the surface air temperature from the observational products Berkeley Earth (i-l) and HadCRUT6.4 (q-t) and additionally, the T2m from the 20CRv2c reanalysis (m-p).



**Table S1| Comparison of Fye et al. (2003) and our study**

**Table S1.** Comparison of our clustering approach with the droughts found by Fye et al. (2003). “Dust Bowl”-type droughts are marked with dark shading, 1950s-type droughts with light shading. Overlapping droughts were attributed to each other.

| Fye et al. (2003)      | Our study | N drought years | Cluster |
|------------------------|-----------|-----------------|---------|
| 1946-1958              | 1952-1965 | 14              | 2       |
| 1929-1940              | 1931-1939 | 9               | 1       |
| 1897-1904 <sup>+</sup> |           |                 |         |
|                        | 1892-1896 | 5               | 2       |
| 1870-1883              | 1869-1874 | 6               | 1       |
| 1855-1865              | 1855-1866 | 12              | 2       |
| 1841-1848              |           |                 |         |
| 1818-1824              | 1817-1824 | 8               | 2       |
| 1805-1814              |           |                 |         |
|                        | 1783-1791 | 9               | 2       |
| 1772-1782              | 1772-1776 | 5               | 1       |
| 1752-1760*             | 1753-1758 | 6               | 1       |
| 1752-1757*             |           |                 |         |
| 1728-1744              | 1734-1743 | 10              | 2       |
|                        | 1716-1720 | 5               | 1       |
| 1703-1712              | 1703-1710 | 8               | 1       |
| 1663-1672              | 1663-1671 | 9               | 2       |
|                        | 1652-1656 | 5               | 1       |
|                        | 1644-1648 | 5               | 1       |
| 1626-1634*             | 1624-1634 | 11              | 1       |
| 1622-1628*             |           |                 |         |

<sup>+</sup> Given the 5-yr moving average used in the definition, these droughts might be considered the same.

\* These two droughts overlap in Fye et al. (2003).
